# Supplementary material for: New Ru(ii) complex for dual photochemotherapy: release of cathepsin K inhibitor and1O2production
Source: Royal Society of Chemistry journal article supplement (doi:10.1039/c8dt00876k), 2018-01-01
Supplement: c8dt00876k1.pdf [file c8dt00876k1.pdf]

# New Ru(II) Complex for Dual Photochemotherapy: Release of Cathepsin K Inhibitor and $^1\text{O}_2$ Production

Thomas N. Rohrabough Jr.,<sup>†</sup> Kelsey A. Collins,<sup>†</sup> Congcong Xue,<sup>†</sup> Jessica K. White,<sup>§\*</sup>  
Jeremy J. Kodanko,<sup>‡\*</sup> and Claudia Turro<sup>†\*</sup>

<sup>†</sup>*Department of Chemistry and Biochemistry, The Ohio State University, Columbus, Ohio 43210*

<sup>§</sup>*Department of Chemistry and Biochemistry, Ohio University, Athens, OH 45701*

<sup>‡</sup>*Department of Chemistry, Wayne State University, Detroit, MI 48202*

| <b>Contents</b>                                                                                    | <b>Pages</b> |
|----------------------------------------------------------------------------------------------------|--------------|
| <b>Figure S1.</b> $^1\text{H}$ NMR spectra of <b>1</b> – <b>4</b> in $d_6$ -acetone                | S2           |
| <b>Figure S2.</b> The ESI-MS spectra of <b>1</b> – <b>4</b> .                                      | S2           |
| <b>Figure S3.</b> Electronic absorption spectra of <b>1</b> – <b>4</b> in $\text{CH}_3\text{CN}$ . | S3           |
| <b>Figure S4.</b> Photolysis of <b>3</b> and <b>4</b> .                                            | S3           |
| <b>Figure S5.</b> Absorption spectra of <b>4</b> in water kept for 120 min in the dark.            | S4           |
| <b>Figure S6.</b> Absorption spectra of <b>2</b> in water kept for 30 min in the dark.             | S4           |
| <b>Figure S7.</b> Absorption spectra of <b>3</b> in water kept for 90 min in the dark.             | S5           |
| <b>Figure S8.</b> Absorption spectra of <b>1</b> in water kept for 30 min in the dark.             | S5           |
| <b>Figure S9.</b> Ethidium bromide-imaged agarose gel of <b>2</b> , <b>4</b> , <b>6</b> .          | S6           |
| <b>Equation S1.</b> Equation used to calculate the ligand exchange quantum yield ( $\Phi_L$ ).     | S6           |
| <b>Equation S2.</b> Equation used to calculate the mean fraction of light absorbed.                | S6           |

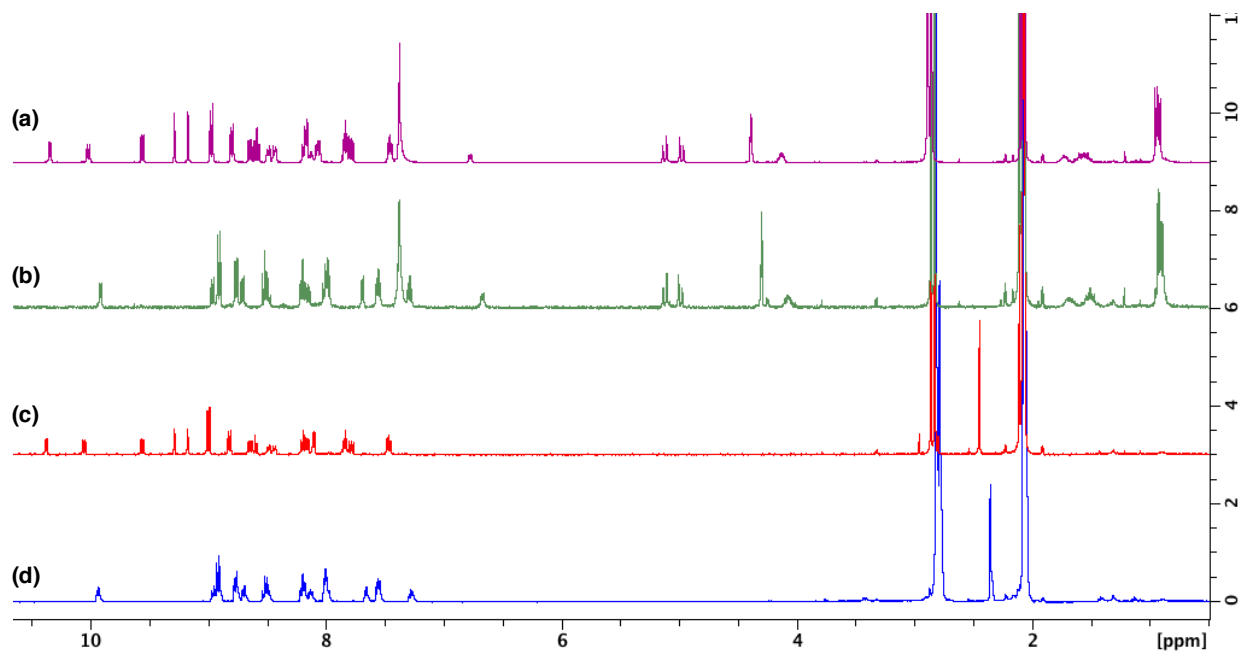

**Figure S1.**  $^1\text{H}$  NMR spectra of  $[\text{Ru}(\text{tpy})(\text{dppn})(\text{Cbz-Leu-NHCH}_2\text{CN})](\text{PF}_6)_2$  (a),  $[\text{Ru}(\text{tpy})(\text{bpy})(\text{Cbz-Leu-NHCH}_2\text{CN})](\text{PF}_6)_2$  (b),  $[\text{Ru}(\text{tpy})(\text{dppn})(\text{CH}_3\text{CN})](\text{PF}_6)_2$  (c), and  $[\text{Ru}(\text{tpy})(\text{bpy})(\text{CH}_3\text{CN})](\text{PF}_6)_2$  (d) in  $d_6$ -acetone.

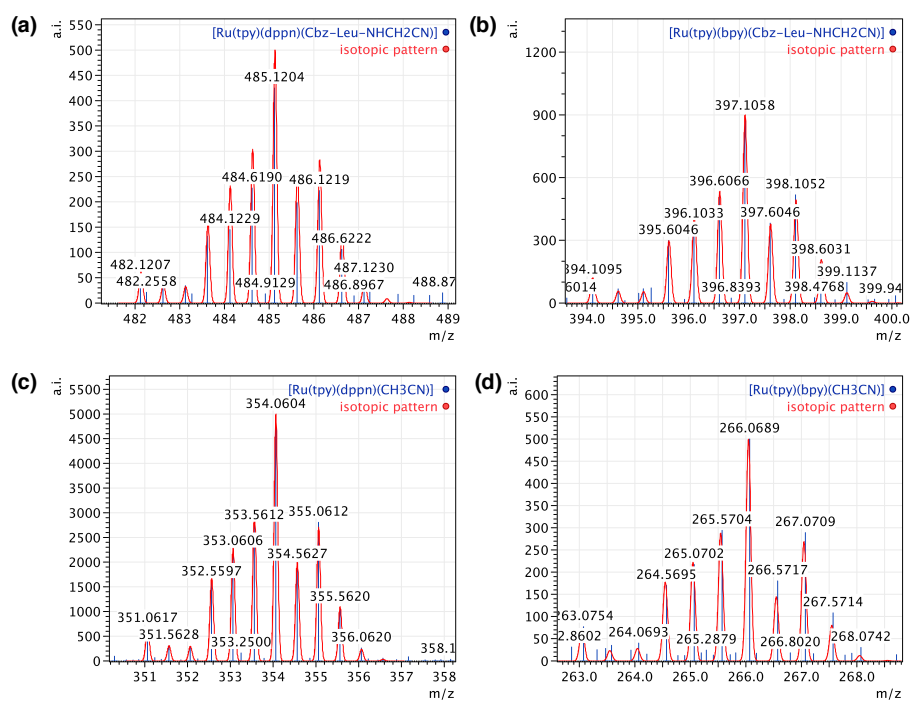

**Figure S2.** The ESI-MS spectra experimental (—) and calculated (—) of  $[\text{Ru}(\text{tpy})(\text{dppn})(\text{Cbz-Leu-NHCH}_2\text{CN})](\text{PF}_6)_2$  (a),  $[\text{Ru}(\text{tpy})(\text{bpy})(\text{Cbz-Leu-NHCH}_2\text{CN})](\text{PF}_6)_2$  (b),  $[\text{Ru}(\text{tpy})(\text{dppn})(\text{CH}_3\text{CN})](\text{PF}_6)_2$  (c), and  $[\text{Ru}(\text{tpy})(\text{bpy})(\text{CH}_3\text{CN})](\text{PF}_6)_2$  (d)

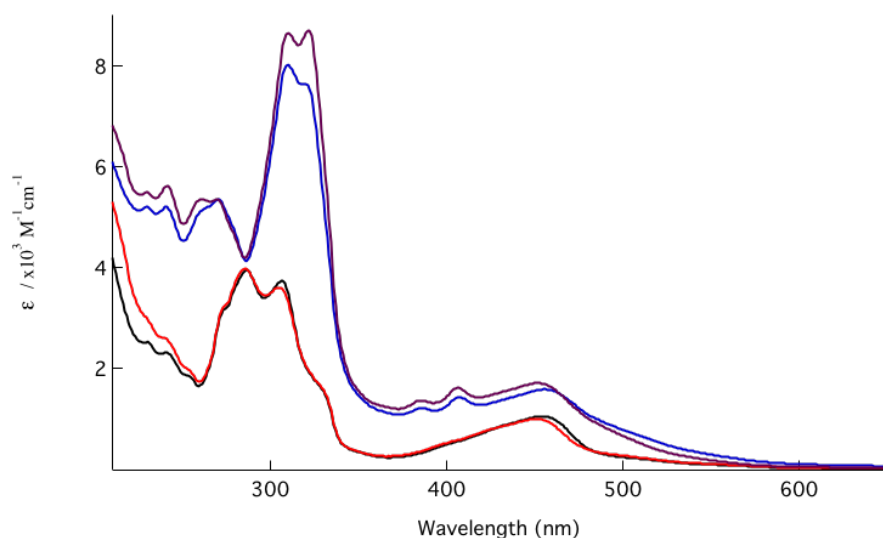

**Figure S3.** Electronic absorption spectra of  $[\text{Ru}(\text{tpy})(\text{dppn})(\text{Cbz-Leu-NHCH}_2\text{CN})]^{2+}$  (—),  $[\text{Ru}(\text{tpy})(\text{bpy})(\text{Cbz-Leu-NHCH}_2\text{CN})]^{2+}$  (—),  $[\text{Ru}(\text{tpy})(\text{dppn})(\text{CH}_3\text{CN})]^{2+}$  (—),  $[\text{Ru}(\text{tpy})(\text{bpy})(\text{CH}_3\text{CN})]^{2+}$  (—) in Acetonitrile.

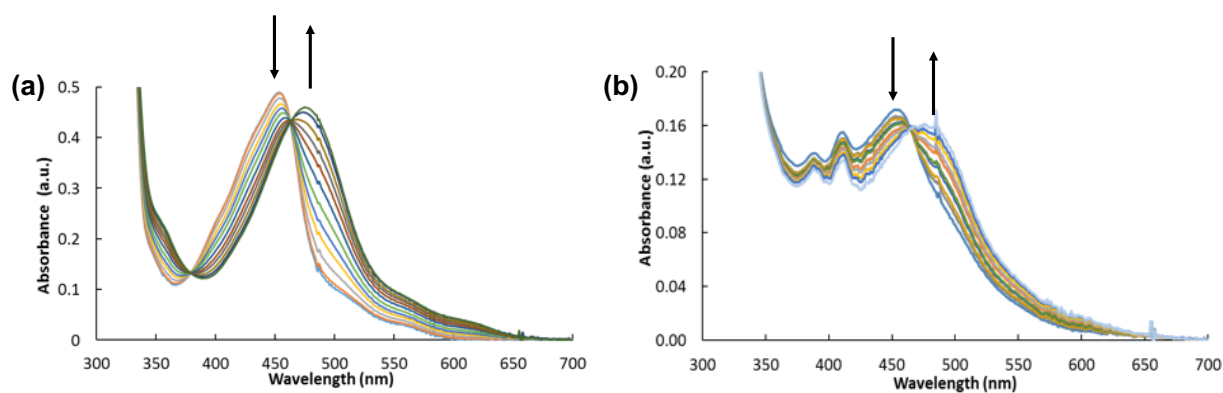

**Figure S4.** Electronic absorption spectra of  $[\text{Ru}(\text{tpy})(\text{bpy})(\text{CH}_3\text{CN})]^{2+}$  (a) and  $[\text{Ru}(\text{tpy})(\text{dppn})(\text{CH}_3\text{CN})]^{2+}$  (b) in aqueous solution (< 5% acetone; sparged with  $\text{N}_2$  for 10 min) irradiated with  $\lambda_{\text{irr}} \geq 395$  nm for 0-50 min and 0-140 min, respectively.

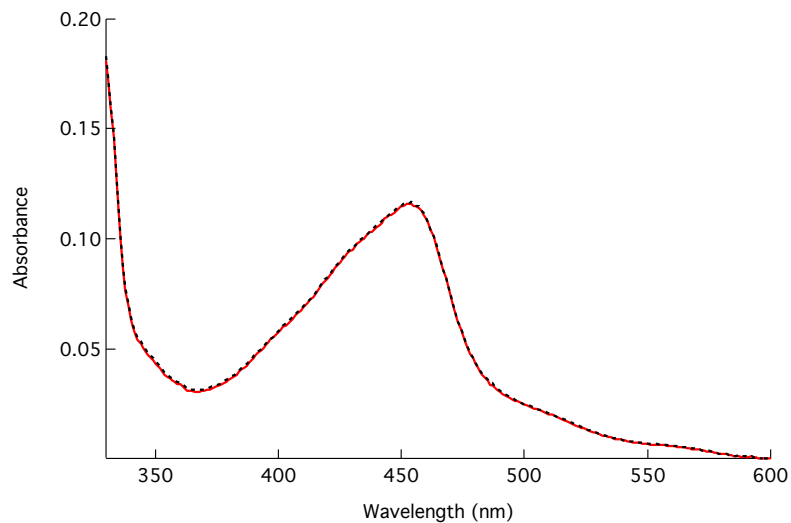

**Figure S5.** Electronic absorption spectra of  $[\text{Ru}(\text{tpy})(\text{bpy})(\text{CH}_3\text{CN})]^{2+}$  in water (<5% acetone) (—) and after 2 hours in the dark (---).

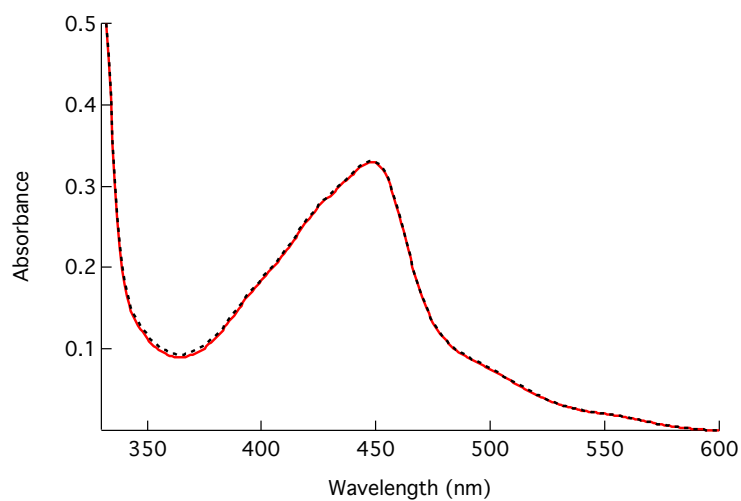

**Figure S6.** Electronic absorption spectra of  $[\text{Ru}(\text{tpy})(\text{bpy})(\text{Cbz-Leu-NHCH}_3\text{CN})]^{2+}$  in water (<5% acetone) (—) and after 30 mins in the dark (---).

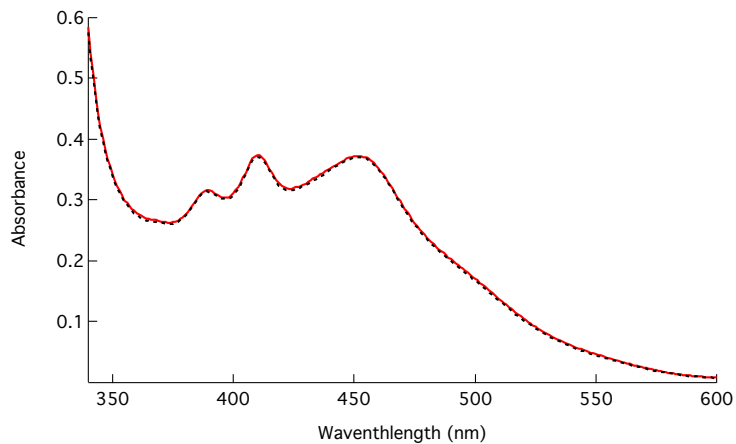

**Figure S7.** Electronic absorption spectra of  $[\text{Ru}(\text{tpy})(\text{dppn})(\text{CH}_3\text{CN})]^{2+}$  in water (<5% acetone) (—) and after 1.5 hours in the dark (---).

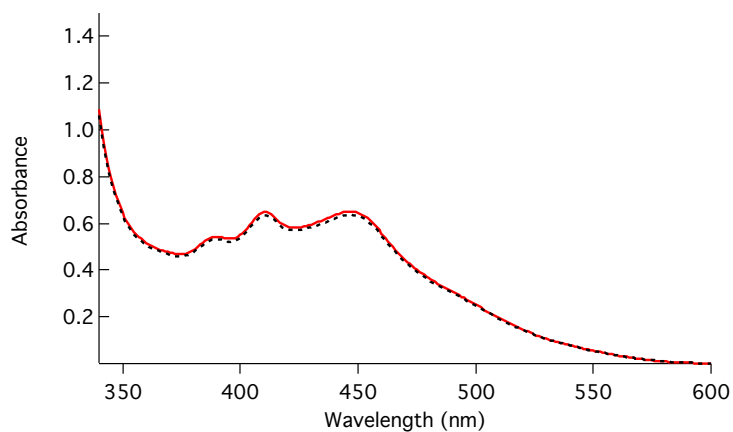

**Figure S8.** Electronic absorption spectra of  $[\text{Ru}(\text{tpy})(\text{dppn})(\text{Cbz-Leu-NHCH}_3\text{CN})]^{2+}$  in water (<5% acetone) (—) and after 30 mins in the dark (---).

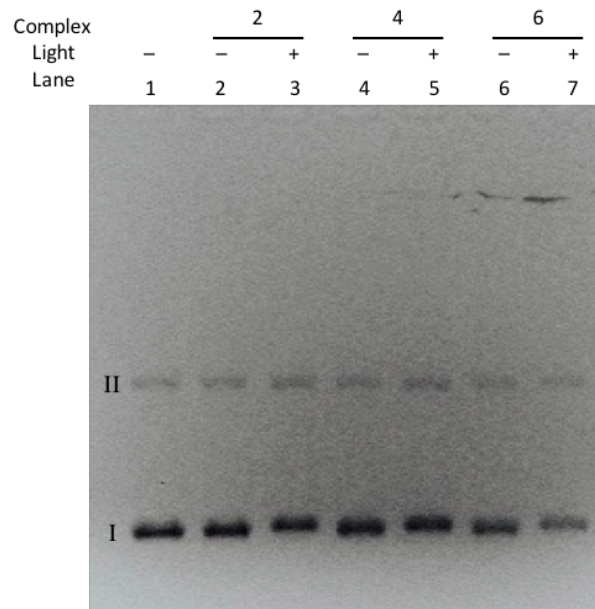

**Figure S9.** Ethidium bromide-imagined agarose gel (1%) of 100  $\mu\text{M}$  pUC19 (5  $\mu\text{M}$  Tris buffer, pH = 7.5, 50  $\mu\text{M}$  NaCl) and 10  $\mu\text{M}$  of complexes **2**, **4**, **6** in air ( $\lambda_{\text{ir}} \geq 395$  nm, 5 min). Where lanes 1, 2, 4, 6 are dark controls and lanes 3, 5, and 7 are irradiated: lane 1, plasmid only; lanes 2 and 3, **2**; lanes 4 and 5, **4**; lanes 6 and 7, **6**.

$$\Phi_L = \left( \frac{\text{rate of consumption of reactant}}{\text{photon flux}} \right) \left( \frac{1}{f_m} \right)$$

**Equation S1.** Equation used to calculate the ligand exchange quantum yield ( $\Phi_L$ ), where  $f_m$  is the mean fraction of light absorbed by the sample.<sup>S1</sup>

$$f_m = \frac{(1 - 10^{-A_0}) + (1 - 10^{-A_f})}{2}$$

**Equation S2.** Equation used to calculate the mean fraction of light absorbed by the sample, where  $A_0$  is the initial absorbance at the irradiation wavelength (450 nm) before irradiation and  $A_f$  is the final absorbance at the irradiation wavelength at the end of the experiment.

## REFERENCES

- (S1) V. Balzani, P. Ceroni and A. Juris, *Photochemistry and Photophysics Concepts, Research, Applications*, Wiley-VCH, Weinheim, Bergstr, 2014.
